# Supplementary material
Source: ML conference proceedings conference paper supplement (https://openreview.net/forum?id=tqi_45ApQzF)
Supplement: supplementary_material [file attachment]

## Supplementary Material

### 7 Proof of Theorem 1

In this section, we prove Theorem 1 on the effect of shift invariance on the margin of a linear classifier. We call a linear classifier shift invariant when it places all possible shifts of a signal in the same class. We prove that for a shift invariant linear classifier the margin will depend only on differences in the DC components of the training signals. It follows that for the two classes shown in Figure 1, the margin of a linear, shift invariant classifier will shrink in proportion to  $\frac{1}{\sqrt{d}}$ , where  $d$  is the number of image pixels.

**Theorem 1.** *Let  $S_1$  and  $S_2$  denote the sets of all shifts of  $X_1$  and  $X_2$ , as described above. They are linearly separable if and only if  $\max_{\mathbf{x}_1 \in S_1} f_{dc}(\mathbf{x}_1) < \min_{\mathbf{x}_2 \in S_2} f_{dc}(\mathbf{x}_2)$  or  $\max_{\mathbf{x}_2 \in S_2} f_{dc}(\mathbf{x}_2) < \min_{\mathbf{x}_1 \in S_1} f_{dc}(\mathbf{x}_1)$ . Furthermore, if the two classes are linearly separable then, if the first inequality holds, the margin is  $\min_{\mathbf{x}_2 \in S_2} f_{dc}(\mathbf{x}_2) - \max_{\mathbf{x}_1 \in S_1} f_{dc}(\mathbf{x}_1)$ , and similarly if the second inequality holds. Furthermore, the max margin separating hyperplane has a normal of  $\bar{\mathbf{w}}$ .*

*Proof.* We only consider the case in which  $\max_{\mathbf{x}_1 \in S_1} f_{dc}(\mathbf{x}_1) < \min_{\mathbf{x}_2 \in S_2} f_{dc}(\mathbf{x}_2)$ , without loss of generality. Two classes are linearly separable iff there exists a  $d$ -dimensional unit vector  $\mathbf{w}$  and a threshold  $T$  such that:  $\forall \mathbf{x}_1 \in S_1, \mathbf{w}^T \mathbf{x}_1 \leq T$  and  $\forall \mathbf{x}_2 \in S_2, \mathbf{w}^T \mathbf{x}_2 \geq T$ . We say the margin is:  $\min_{\mathbf{x}_1 \in S_1, \mathbf{x}_2 \in S_2} \mathbf{w}^T \mathbf{x}_2 - \mathbf{w}^T \mathbf{x}_1$ .

First, it is obvious that if  $\max_{\mathbf{x}_1 \in S_1} f_{dc}(\mathbf{x}_1) < \min_{\mathbf{x}_2 \in S_2} f_{dc}(\mathbf{x}_2)$  then  $S_1$  and  $S_2$  are linearly separable, by letting  $\mathbf{w} = \bar{\mathbf{w}}$ , and

$$T = \max_{\mathbf{x}_1 \in S_1} f_{dc}(\mathbf{x}_1) + \frac{\min_{\mathbf{x}_2 \in S_2} f_{dc}(\mathbf{x}_2) - \max_{\mathbf{x}_1 \in S_1} f_{dc}(\mathbf{x}_1)}{2}$$

The margin for  $\bar{\mathbf{w}}$  is  $\min_{\mathbf{x}_2 \in S_2} f_{dc}(\mathbf{x}_2) - \max_{\mathbf{x}_1 \in S_1} f_{dc}(\mathbf{x}_1)$ .

Second, we consider the opposite direction, supposing that the two classes are linearly separable. In this case there exist some  $\mathbf{w}$  and  $T$  that will separate the classes. We can assume WLOG that  $\|\mathbf{w}\| = 1$  and  $f_{dc}(\mathbf{w}) > 0$ . Let  $\mathbf{x}_1 \in X_1$ . Then we have WLOG:  $\forall s \quad \mathbf{w}^T \mathbf{x}_1^s < T$ . This gives:

$$\frac{\sum_{s=0}^{d-1} \mathbf{w}^T \mathbf{x}_1^s}{d} < T \implies \frac{\mathbf{w}^T \sum_{s=0}^{d-1} \mathbf{x}_1^s}{d} < T$$

Note that  $\forall \mathbf{x} \in \mathbb{R}^d$ ,  $\sum_{s=0}^{d-1} \mathbf{x}^s$  is just a constant vector of length  $d$  with each term equal to  $\sqrt{d} f_{dc}(\mathbf{x})$ . Therefore:

$$\frac{\sum_{s=0}^{d-1} \mathbf{w}^T \mathbf{x}^s}{d} = f_{dc}(\mathbf{w}) f_{dc}(\mathbf{x}) \quad (1)$$

so

$$f_{dc}(\mathbf{w}) f_{dc}(\mathbf{x}_1) < T \quad \forall \mathbf{x}_1 \in X_1$$

By similar reasoning, we have:

$$f_{dc}(\mathbf{w}) f_{dc}(\mathbf{x}_2) > T \quad \forall \mathbf{x}_2 \in X_2$$

Because  $f_{dc}(\mathbf{w}) > 0$ ,  $f_{dc}(\mathbf{x}_1) < f_{dc}(\mathbf{x}_2)$ . So:

$$\max_{\mathbf{x}_1 \in X_1} f_{dc}(\mathbf{x}_1) < \frac{T}{f_{dc}(\mathbf{w})} \quad \text{and} \quad \min_{\mathbf{x}_2 \in X_2} f_{dc}(\mathbf{x}_2) > \frac{T}{f_{dc}(\mathbf{w})}$$

so

$$\max_{\mathbf{x}_1 \in X_1} f_{dc}(\mathbf{x}_1) < \min_{\mathbf{x}_2 \in X_2} f_{dc}(\mathbf{x}_2) \quad (2)$$

This shows that  $S_1$  and  $S_2$  are linearly separable if and only if their DC components are separable.

We now show that if  $S_1$  and  $S_2$  are linearly separable, for the max margin separator we have  $\mathbf{w} = \bar{\mathbf{w}}$ , with a margin of  $\min_{\mathbf{x}_1 \in S_1} f_{dc}(\mathbf{x}_1) - \max_{\mathbf{x}_2 \in S_2} f_{dc}(\mathbf{x}_2)$ . Because  $\bar{\mathbf{w}}^T \mathbf{x} = f_{dc}(\mathbf{x})$ , and the DC components are separable,  $\bar{\mathbf{w}}$  separates the data, and we can see that the margin will be  $\min_{\mathbf{x} \in S_2} f_{dc}(\mathbf{x}) - \max_{\mathbf{x} \in S_1} f_{dc}(\mathbf{x})$ .

554 So, it remains to show that no other choice of  $\mathbf{w}$  separates the data with a larger margin. Because we  
 555 assume, WLOG that  $\|\mathbf{w}\| = 1$  the margin is:

$$\min_{\mathbf{x}_2 \in S_2} \mathbf{w}^T \mathbf{x}_2 - \max_{\mathbf{x}_1 \in S_1} \mathbf{w}^T \mathbf{x}_1$$

556 We will show that  $\forall \mathbf{x}_1 \in X_1, \mathbf{x}_2 \in X_2$  and  $\forall \mathbf{w}$  such that  $\|\mathbf{w}\| = 1$ :

$$\min_s \mathbf{w}^T \mathbf{x}_2^s - \max_s \mathbf{w}^T \mathbf{x}_1^s \leq \min_s \bar{\mathbf{w}}^T \mathbf{x}_2^s - \max_s \bar{\mathbf{w}}^T \mathbf{x}_1^s \quad (3)$$

557 which implies that the margin from  $\bar{\mathbf{w}}$  is greater than or equal to the margin from  $\mathbf{w}$ . We note that  
 558  $\min_s \bar{\mathbf{w}}^T \mathbf{x}_2^s - \max_s \bar{\mathbf{w}}^T \mathbf{x}_1^s = f_{dc}(\mathbf{x}_2) - f_{dc}(\mathbf{x}_1)$ .

559 From Equation 1 we know that

$$\max_s \mathbf{w}^T \mathbf{x}^s \geq f_{dc}(\mathbf{w}) f_{dc}(\mathbf{x}), \quad \min_s \mathbf{w}^T \mathbf{x}^s \leq f_{dc}(\mathbf{w}) f_{dc}(\mathbf{x})$$

560 This implies that:

$$\min_s \mathbf{w}^T \mathbf{x}_2 - \max_s \mathbf{w}^T \mathbf{x}_1 \leq f_{dc}(\mathbf{w})(f_{dc}(\mathbf{x}_2) - f_{dc}(\mathbf{x}_1))$$

561 Given the constraint that  $\|\mathbf{w}\| = 1$ ,  $f_{dc}(\mathbf{w})$  is maximized by  $\bar{\mathbf{w}}$ , and so  $f_{dc}(\mathbf{w}) \leq 1$ , and

$$f_{dc}(\mathbf{w})(f_{dc}(\mathbf{x}_2) - f_{dc}(\mathbf{x}_1)) \leq f_{dc}(\mathbf{x}_2) - f_{dc}(\mathbf{x}_1)$$

562 and Eq. 3 is shown to hold.

563

□

## 564 8 Proof of Theorem 2 and Lemma 1

565 In this section, we first define FC networks with the neural tangent kernel (NTK) (Jacot et al., 2018)  
 566 and CNNs with a convolutional neural tangent kernel (CNTK) (Arora et al., 2019; Li et al., 2019)  
 567 which we will use in the proof. Then we give the proofs of Theorem 2 and Lemma 1.

568 Let  $\mathbf{x} \in \mathbb{R}^d$  denote the input to the network. A two-layer fully connected network is defined by

$$f_{\text{FC}}(\mathbf{x}; W, \mathbf{v}) = \mathbf{v}^T \sigma(W\mathbf{x}), \quad (4)$$

569 where  $W \in \mathbb{R}^{m \times d}$  and  $\mathbf{v} \in \mathbb{R}^m$  are learnable parameters and  $\sigma(\cdot)$  is the ReLU function applied  
 570 elementwise. Assuming  $W$  and  $\mathbf{v}$  are initialized with normal distribution, the corresponding FC-NTK  
 571 for inputs  $\mathbf{z}, \mathbf{x} \in \mathbb{R}^d$  is given by (Bietti & Mairal, 2019)

$$k(\mathbf{z}, \mathbf{x}) = \frac{1}{\pi} (2\mathbf{z}^T \mathbf{x} (\pi - \phi) + \|\mathbf{z}\| \|\mathbf{x}\| \sin \phi), \quad (5)$$

572 where  $\phi$  denotes the angle between  $\mathbf{z}$  and  $\mathbf{x}$ , i.e.,  $\phi = \arccos \left( \frac{\mathbf{z}^T \mathbf{x}}{\|\mathbf{z}\| \|\mathbf{x}\|} \right)$ .

573 Next we define the shift invariant convolutional model. Given an input  $\mathbf{x} \in \mathbb{R}^d$  and filters  $\{\mathbf{w}_i\}_{i=1}^m \subset$   
 574  $\mathbb{R}^q$  we denote by  $\mathbf{w}_i * \mathbf{x} \in \mathbb{R}^d$  the circular convolution of  $\mathbf{x}$  with the filter  $\mathbf{w}_i$  (with no bias).  $W * \mathbf{x}$   
 575 denotes the results of these convolutions, represented as an  $m \times d$  matrix, with the  $m \times q$  matrix  $W$   
 576 denoting the collection of all filters  $\{\mathbf{w}_i\}_{i=1}^m$ . Finally, let  $\mathbf{v} \in \mathbb{R}^m$ . Then a two layer convolutional  
 577 network with global average pooling is defined by

$$f_{\text{Conv}}(\mathbf{x}; W, \mathbf{v}) = \frac{1}{d} \mathbf{v}^T \sigma(W * \mathbf{x}) \mathbf{1}_d, \quad (6)$$

578  $W$  and  $\mathbf{v}$  include the learnable parameters initialized with the standard normal distribution and  
 579  $\mathbf{1}_d \in \mathbb{R}^d$  is the vector of all ones. In this model the input  $\mathbf{x}$  is convolved with the rows of  $W$ . After  
 580 ReLU the result undergoes a  $1 \times 1$  convolution with parameters  $\mathbf{v}$  followed by global average pooling,  
 581 captured by the multiplication with  $\frac{1}{d} \mathbf{1}_d$ .

582 Given inputs  $\mathbf{z}, \mathbf{x} \in \mathbb{R}^d$ , denote by  $\bar{\mathbf{z}}_i, \bar{\mathbf{x}}_j \in \mathbb{R}^q$  their (cyclic) patches,  $1 \leq i, j \leq d$ , so for  
 583 example  $\bar{\mathbf{z}}_i = (z_i, z_{(i+1) \bmod d}, \dots, z_{(i+q-1) \bmod d})^T$ . Then the corresponding CNTK-GAP  $K(\mathbf{z}, \mathbf{x})$   
 584 is constructed as follows.

$$K(\mathbf{z}, \mathbf{x}) = \frac{1}{d^2} \sum_{i=1}^d \sum_{j=1}^d k(\bar{\mathbf{z}}_i, \bar{\mathbf{x}}_j), \quad (7)$$

585 where  $k(\bar{\mathbf{z}}_i, \bar{\mathbf{x}}_j)$  is the FC-NTK given by (5) (see a related construction in (Tachella et al., 2020)).

586 We use FC-NTK and CNTK-GAP in kernel regression. Given training data  $\{(\mathbf{x}_i, y_i)\}_{i=1}^n$ ,  $\mathbf{x}_i \in \mathcal{X}$ ,  
 587  $y_i \in \mathbb{R}$ , kernel ridge regression is the solution to (Saitoh & Sawano, 2016)

$$g_k = \arg \min_{g \in \mathcal{H}_k} \sum_{i=1}^n (g(\mathbf{x}_i) - y_i)^2 + \lambda \|g\|_{\mathcal{H}_k}^2, \quad (8)$$

588 where  $\mathcal{H}_k$  denotes the reproducing kernel Hilbert space associated with  $k$ . The solution of (8) is  
 589 given by

$$g_k(\mathbf{z}) = (k(\mathbf{z}, \mathbf{x}_1), \dots, k(\mathbf{z}, \mathbf{x}_n))(H_k + \lambda I)^{-1} \mathbf{y}, \quad (9)$$

590 where  $H_k$  is the  $n \times n$  matrix with its  $i, j$ 'th entry  $k(\mathbf{x}_i, \mathbf{x}_j)$ ,  $I$  denotes the identity matrix, and  
 591  $\mathbf{y} = (y_1, \dots, y_n)^T$ . Below we consider the minimum norm interpolant, i.e.,

$$g_k = \arg \min_{g \in \mathcal{H}_k} \|g\|_{\mathcal{H}_k} \quad \text{s.t.} \quad \forall i, g(\mathbf{x}_i) = y_i. \quad (10)$$

592 which is obtained when we let  $\lambda \rightarrow 0$ .

593 **Theorem 2.** Let  $\mathbf{x}, -\mathbf{x} \in \mathbb{R}^d$  be two training vectors with class labels 1,  $-1$  respectively.

- 594 1. Let  $k(\mathbf{z}, \mathbf{x})$  denote NTK for the bias-free, two-layer fully connected network. Then  $\forall \mathbf{z} \in \mathbb{R}^d$ ,  
 595 the minimum norm interpolant  $g_k(\mathbf{z}) \geq 0$  iff  $\mathbf{z}^T \mathbf{x} \geq 0$ .
- 596 2. Let  $K(\mathbf{z}, \mathbf{x})$  denote CNTK-GAP for the bias-free, two-layer convolutional network, and  
 597 assume  $H_K$  is invertible. Then  $\forall \mathbf{z} \in \mathbb{R}^d$ , either  $g_K(\mathbf{z}) \geq 0$  iff  $\mathbf{z}^T \mathbf{1}_d \geq 0$  or  $g_K(\mathbf{z}) \geq 0$  iff  
 598  $\mathbf{z}^T \mathbf{1}_d \leq 0$ . (I.e.,  $\mathbf{z}^T \mathbf{1}_d = 0$  forms a separating hyperplane.)

599 The theorem tells us that NTK and CNTK produce linear classifiers. (1) tells us that NTK produces a  
 600 separating hyperplane with a normal vector  $\mathbf{x}$ , while (2) says that for CNTK the normal direction is  
 601  $\mathbf{1}_d$ .

602 *Proof.* 1. Solving the regression problem (9) with  $\lambda \rightarrow 0$  we have

$$H_k = \begin{pmatrix} k(\mathbf{x}, \mathbf{x}) & k(\mathbf{x}, -\mathbf{x}) \\ k(-\mathbf{x}, \mathbf{x}) & k(-\mathbf{x}, -\mathbf{x}) \end{pmatrix} = 2\mathbf{x}^T \mathbf{x} I,$$

603 where the latter equality is obtained from (5) by noting that  $\phi = 0$  along the diagonal and  
 604  $\phi = \pi$  for the off-diagonal entries. Therefore, using (9) and noting that  $\mathbf{y} = (1, -1)^T$ ,

$$g_k(\mathbf{z}) = \frac{1}{2\mathbf{x}^T \mathbf{x}} (k(\mathbf{z}, \mathbf{x}) - k(\mathbf{z}, -\mathbf{x}))$$

605 Given a test point  $\mathbf{z} \in \mathbb{R}^d$ , let  $\phi$  now denote the angle between  $\mathbf{z}$  and  $\mathbf{x}$  and note that the  
 606 angle between  $\mathbf{z}$  and  $-\mathbf{x}$  is  $\pi - \phi$ . Therefore,

$$\begin{aligned} k(\mathbf{z}, \mathbf{x}) &= \frac{1}{\pi} (2\mathbf{z}^T \mathbf{x}(\pi - \phi) + \|\mathbf{z}\| \|\mathbf{x}\| \sin \phi) \\ k(\mathbf{z}, -\mathbf{x}) &= \frac{1}{\pi} (-2\mathbf{z}^T \mathbf{x}\phi + \|\mathbf{z}\| \|\mathbf{x}\| \sin \phi), \end{aligned}$$

607 implying that

$$k(\mathbf{z}, \mathbf{x}) - k(\mathbf{z}, -\mathbf{x}) = 2\mathbf{z}^T \mathbf{x}. \quad (11)$$

608 from which we obtain  $g_k(\mathbf{z}) = \frac{\mathbf{z}^T \mathbf{x}}{\mathbf{x}^T \mathbf{x}}$ . Consequently,  $g_k(\mathbf{z}) > 0$  if and only if  $\mathbf{z}^T \mathbf{x} > 0$ .

- 609 2. Using the definition of  $K$  (Eq. 7) it is clear that  $K(\mathbf{x}, \mathbf{x}) = K(-\mathbf{x}, -\mathbf{x})$ . Therefore, using  
 610 Lemma 1 we need to show that  $K(\mathbf{z}, \mathbf{x}) > K(\mathbf{z}, -\mathbf{x})$  on one side of the plane  $\mathbf{z}^T \mathbf{1}_d = 0$ .  
 611 Consider the patches  $\bar{\mathbf{z}}_i$  in  $\mathbf{z}$  and  $\bar{\mathbf{x}}_j$  in  $\mathbf{x}$ . From (11) we have

$$k(\bar{\mathbf{z}}_i, \bar{\mathbf{x}}_j) - k(\bar{\mathbf{z}}_i, -\bar{\mathbf{x}}_j) = 2\bar{\mathbf{z}}_i^T \bar{\mathbf{x}}_j,$$

612 implying that

$$K(\mathbf{z}, \mathbf{x}) - K(\mathbf{z}, -\mathbf{x}) = \frac{2}{d^2} \sum_{i=1}^d \sum_{j=1}^d \bar{\mathbf{z}}_i^T \bar{\mathbf{x}}_j.$$

613 Rewriting this in matrix notation we have

$$K(\mathbf{z}, \mathbf{x}) - K(\mathbf{z}, -\mathbf{x}) = \frac{2}{d^2} \mathbf{1}_d^T Z^T X \mathbf{1}_d,$$

614 where  $Z$  and  $X$  are  $q \times d$  matrices whose columns respectively contain all the patches of  
 615  $\mathbf{z}$  and  $\mathbf{x}$ . Since all rows of  $Z$  and  $X$  are identical up to a cyclic permutation  $\hat{\mathbf{z}} = Z \mathbf{1}_d$  and  
 616  $\hat{\mathbf{x}} = X \mathbf{1}_d$  are vectors of constants in  $\mathbb{R}^q$  with the constants  $\mathbf{z}^T \mathbf{1}_d$  and  $\mathbf{x}^T \mathbf{1}_d$  respectively.  
 617 Consequently, using Lemma 1

$$g_K(\mathbf{z}) = c(K(\mathbf{z}, \mathbf{x}) - K(\mathbf{z}, -\mathbf{x})) = \frac{2cq}{d^2} (\mathbf{z}^T \mathbf{1}_d)(\mathbf{x}^T \mathbf{1}_d).$$

618 where, because  $K$  is positive definite and  $H_K$  is invertible,  $c = 1/(K(\mathbf{x}, \mathbf{x}) - K(\mathbf{x}, -\mathbf{x})) >$   
 619  $0$ . Denoting  $\beta = \frac{2cq}{d^2} (\mathbf{x}^T \mathbf{1}_d)$ , we obtain that  $g_K(\mathbf{z}) > 0$  if and only if  $\text{sign}(\beta) \mathbf{z}^T \mathbf{1}_d > 0$ ,  
 620 proving the theorem.

621 □

622 The following lemma was used to prove Thm. 2.

623 **Lemma 1.** *Let  $k(., .)$  be a positive definite kernel with a training set  $\{(\mathbf{x}_1, +1), (\mathbf{x}_2, -1)\} \subset \mathbb{R}^d \times \mathbb{R}$ .  
 624 If  $k(\mathbf{x}_1, \mathbf{x}_1) = k(\mathbf{x}_2, \mathbf{x}_2)$  and  $H_k$  is invertible with  $\lambda \rightarrow 0$  then a test point  $\mathbf{z} \in \mathbb{R}^d$  is classified as  
 625  $+1$  if and only if  $k(\mathbf{z}, \mathbf{x}_1) > k(\mathbf{z}, \mathbf{x}_2)$ .*

626 *Proof.* Denote by  $a = k(\mathbf{x}_1, \mathbf{x}_1) = k(\mathbf{x}_2, \mathbf{x}_2)$  and  $b = k(\mathbf{x}_1, \mathbf{x}_2)$ , then  $H_k = \begin{pmatrix} a & b \\ b & a \end{pmatrix}$ . Clearly,  
 627  $\mathbf{y} = (1, -1)^T$  is an eigenvector of  $H_k$  with the eigenvalue  $a - b > 0$ , which is positive due to  
 628 the positive definiteness of  $k$ . Consequently,  $\mathbf{y}$  is also an eigenvector of  $H_k^{-1}$  with eigenvalue  
 629  $1/(a - b) > 0$ . Applying (9) we have

$$\begin{aligned} g_k(\mathbf{z}) &= (k(\mathbf{z}, \mathbf{x}_1), k(\mathbf{z}, \mathbf{x}_2)) H_k^{-1} \mathbf{y} \\ &= \frac{1}{a - b} (k(\mathbf{z}, \mathbf{x}_1) - k(\mathbf{z}, \mathbf{x}_2)) \end{aligned}$$

630 Therefore,  $g_k(\mathbf{z}) > 0$  if and only if  $k(\mathbf{z}, \mathbf{x}_1) > k(\mathbf{z}, \mathbf{x}_2)$ . □
